# Supplementary material for: Integrative Analysis of Metabolome and Transcriptome Reveals the Mechanism of Color Formation in Yellow-Fleshed Kiwifruit
Source: Int J Mol Sci. 2023 Jan 13;24(2):1573. doi: 10.3390/ijms24021573 (PMC9867141; doi:10.3390/ijms24021573)
Supplement: Supplementary file 1 [file ijms-24-01573-s001.zip › Supplementary Table.xlsx]

## Sheet: Table S1
Table S1 Table of linear equations
Component	Equation	R-square
α-Carotene	y=288200x-286	0.9926
Antheraxanthin	y=922536.9624x-126016.8011	0.9987
Zeaxanthin	y=198058.9158x-6466.1738	0.9984
Violaxanthin	y=2767319.5876x-96226.8041	0.9961
Neoxanthin	y=1425609.319x-230125.448	0.9977
β-Carotene	y=292823.1707x+22542.6829	0.9923
Lutein	y=660484.8609x+88061.784	0.993
β-Cryptoxanthin	y=130668.9853x+22553.6007	0.9913
Apocarotenal	y=6034240.5914x-1344200.2688	0.993
α-Cryptoxanthin	y=372222.2222x-6222.2222	0.9992

## Sheet: Table S2
Table S2 List of primers for real-time PCR
Gene name	Primer	Sequence (5’-3’)
Actin	F	TGCATGAGCGATCAAGTTTCAAG
	R	TGTCCCATGTCTGGTTGATGACT
PSY	F	CGAGATTGAAGCCAACGACTAC
	R	GTTCTCGAAGGGGCAACAATAG
PDS	F	AGCAGAAGCCCCCTTCTCAGTG
	R	TCCTCTGCAGGTGCAAAAACCA
LCY-β	F	GTCGTTCCCGATTCGACGTGAT
	R	TGAAAGTGGCGAGGGATCAACA
LCY-ɛ	F	TCGGGTCTACTCTCTCCTCAGC
	R	GGTCGGAAAGTAGATGCCTGAT
ZDS	F	TGCATTGTTTGCCACCAAAACAG
	R	TGCATCCCCACCTGAGATGAAA
CRTISO	F	GGACACCAAAGACACACAGGAG
	R	GTTGTGTTGAATGGCATCCCTA
CRH-β	F	AGAATCGCATGGCGAAGAGGAG
	R	GGACATGACTGCAGCGACAAGG
CRH-ɛ	F	AGGTCCACCACTAAATGGGATG
	R	AGGTCTGGGAGAGAGCAGAAGA
ZEP	F	TAGGGAGTGGGAAGATGCAA
	R	AGCATCACCTAACAGAGTCACG
VDE	F	CCTGAACCACCCCTTGTAGA
	R	CACCTTCTCAACCTCCTCTTCTA
PAL	F	AAATGTGAAACTCTGGGCTGAT
	R	AATAGGCAAAGGAGCCACAA
CHS	F	TGTCAAGCGTTTGCGTGC
	R	CGGAGCACCACTGTCTCAACT
DFR	F	ATGAGGTTTCTTGAACGAGGC
	R	AGGTGTGTGATAGCACTCCCC
FLS	F	GATTATTTTCCAAACGCACTATTC
	R	AACACTGCCCAGGACATACG
4CL	F	TAGGCTATGTAGACGAGGACGAT
	R	TGGGTGGCTCACAAGAAGG
F3H	F	CACCAACAACGACGCTCAC
	R	TCCACGATCTTACGGCAAAT
CHI	F	AAGGATGAGGCAAGAAAGAGG
	R	ATCTTTCAATTTCTCATTAGCTGC
LDOX	F	GGTTACGGGAGTAGGCTTGG
	R	CCAAGACTCACTGAAAAAGCCT
ANR	F	AGAAAGGCTACTCCGTCAACAC
	R	AGACCAAGTCACAGCCTGCTAT
C4H	F	GAGGAAGAGTCGGGTCGG
	R	TCTCTCCATTCAACGCCTTC

## Sheet: Table S3
Table S3 Detection information of flavonoids
Index	Q1 (Da)	Q3 (Da)	Rt (min)	Molecular Weight (Da)	Ionization model	Compounds	Class	mix01	mix02	mix03	T1-1	T1-2	T1-3	T2-1	T2-2	T2-3	T3-1	T3-2	T3-3	T4-1	T4-2	T4-3	T5-1	T5-2	T5-3
pme1587	417.1	255	3.36	416.11	[M+H]+	Daidzein 7-O-glucoside (Daidzin)	Isoflavone	2500000	1120000	1330000	2610000	2170000	2360000	1160000	1070000	1070000	815000	803000	969000	774000	742000	787000	907000	787000	790000
pme3208	445	283	3.54	446.12	[M-H]-	Glycitin	Isoflavone	489000	418000	486000	863000	804000	780000	526000	504000	563000	485000	491000	512000	322000	259000	287000	166000	208000	191000
pme3210	433	271	4.01	432.11	[M+H]+	Genistein 7-O-Glucoside (Genistin)	Isoflavone	2030000	2000000	1880000	7060000	7540000	7700000	1200000	1220000	1220000	928000	848000	736000	524000	351000	339000	260000	166000	203000
pme3251	283	268	5.13	284.07	[M-H]-	Glycitein	Isoflavone	52800	50700	50700	19400	25100	17400	170000	220000	166000	37000	28000	39600	9	9	9	9	9	9
pme3258	269	241	4.48	270.05	[M-H]-	6-Hydroxydaidzein	Isoflavone	26300	23600	30500	58700	63300	57500	26900	24500	28800	25000	25600	28300	8290	12600	11000	9150	7280	8810
pme3263	269	225	4.43	270.05	[M-H]-	2'-Hydroxydaidzein	Isoflavone	43600	37000	50600	132000	127000	133000	43300	46400	28100	36400	44000	38400	27700	22700	24500	17800	9	9
pme3279	287	153	4.89	286.05	[M+H]+	2'-Hydroxygenistein	Isoflavone	706000	568000	616000	2630000	2630000	1160000	84700	74700	70900	41900	49500	85100	9	38500	9	9	9	9
pme3292	283	268	6.97	284.07	[M-H]-	Prunetin	Isoflavone	3730	6140	6050	10700	9	9	4600	8050	8450	6790	9	7530	6120	8580	7510	5340	4810	4870
pma0791	521	273	4.5	520	[M+H]+	Naringenin O-malonylhexoside	Flavanone	687000	497000	516000	2570000	2300000	2110000	169000	194000	183000	78100	59400	64500	9	9	9	195000	207000	248000
pme0001	609.2	301	4.07	610.19	[M-H]-	Hesperetin 7-O-neohesperidoside (Neohesperidin)	Flavanone	14400000	12500000	13000000	63800000	54500000	67500000	2340000	2690000	2690000	2230000	2080000	2390000	1480000	1620000	1520000	1210000	1210000	1170000
pme0330	579.2	271	4.17	580.18	[M-H]-	Naringenin 7-O-neohesperidoside (Naringin)	Flavanone	219000	219000	228000	474000	502000	617000	231000	248000	222000	148000	129000	127000	92600	98000	82000	62000	73000	79800
pme0371	433.1	271	4.22	434.12	[M-H]-	Naringenin 7-O-glucoside (Prunin)	Flavanone	511000	463000	524000	1350000	1370000	1430000	348000	419000	335000	321000	303000	323000	175000	154000	134000	126000	82600	90300
pme0377	273.1	153	5.59	272.07	[M+H]+	Naringenin	Flavanone	282000	261000	229000	967000	964000	1020000	91700	64600	76100	47500	62300	50400	9	9	26500	9	48500	39900
pme1201	273.1	167	5.56	274.08	[M-H]-	Phloretin	Flavanone	57700	62200	57600	292000	291000	317000	9	9	9	9	9	9	9	9	9	9	9	9
pme1399	355.2	178.5	8.4	354.15	[M+H]+	Xanthohumol	Flavanone	32600	39000	37800	64300	65300	71100	55000	56500	50900	24700	26000	31100	13300	13800	12400	7770	5970	8350
pme1583	289.1	153	5.05	288.06	[M+H]+	Eriodictyol	Flavanone	216000	220000	171000	579000	591000	664000	70400	52900	77000	61800	48100	63700	35400	32700	27900	26600	39100	23200
pme1598	463.1	301	3.85	464.13	[M-H]-	Hesperetin 5-O-glucoside	Flavanone	10800000	9460000	9870000	40900000	39000000	42800000	3830000	4050000	4250000	3550000	3440000	3940000	2030000	2380000	2110000	1540000	1560000	1520000
pme2957	271.1	151	5.57	272.07	[M-H]-	Naringenin chalcone	Flavanone	57000	56600	52700	169000	168000	193000	9	9	9	9	9	9	9	9	9	9	9	9
pme3285	275	139	3.4	274.08	[M+H]+	"Afzelechin (3,5,7,4'-Tetrahydroxyflavan)"	Flavanone	395000	433000	406000	983000	954000	937000	376000	352000	388000	169000	160000	149000	86100	118000	145000	82800	93400	102000
pmf0058	271	150.9	5.66	272.07	[M-H]-	"4',5,7-Trihydroxyflavanone"	Flavanone	46900	47500	47400	137000	118000	148000	9	9	9	9	9	9	9	9	9	9	9	9
pme1667	595.2	415	3.36	594.16	[M+H]+	Isovitexin 7-O-glucoside (Saponarin)	Flavonoid	385000	295000	243000	142000	9	9	353000	373000	303000	449000	486000	456000	296000	324000	311000	286000	240000	236000
pmf0179	623.2	315.1	4.04	624.17	[M-H]-	Narcissoside	Flavonoid	542000	505000	570000	1740000	1960000	1990000	277000	288000	302000	263000	280000	259000	212000	229000	189000	173000	188000	165000
pmf0204	465.1	303	3.73	464.1	[M+H]+	Hyperoside	Flavonoid	5910000	3910000	6650000	14700000	23100000	25700000	943000	1090000	937000	721000	892000	798000	723000	545000	688000	569000	547000	561000
pmf0208	465.1	303	3.9	464.1	[M+H]+	Isoquercitroside	Flavonoid	5490000	3930000	4180000	20500000	20400000	25700000	676000	972000	920000	842000	813000	865000	674000	617000	846000	472000	773000	705000
pmf0232	593.1	285	4.92	594.14	[M-H]-	Tiliroside	Flavonoid	108000	66200	57100	181000	189000	210000	9	9	42800	9	9	59300	9	26400	9	9	9	22500
pmf0275	303	121.3	5.13	302.04	[M+H]+	Herbacetin	Flavonoid	242000	260000	230000	358000	224000	242000	496000	317000	297000	188000	198000	358000	436000	223000	378000	461000	495000	360000
pmf0278	465.1	300.7	4	464.1	[M-H]-	Gossypitrin	Flavonoid	209000	152000	189000	826000	732000	791000	62800	62900	73900	69000	48800	71200	37500	46000	31500	25200	33000	20200
pmf0360	449.1	151	3.97	450.12	[M-H]-	Astilbin	Flavonoid	9280000	7720000	7360000	36300000	34500000	38800000	2520000	2570000	2490000	947000	900000	824000	278000	334000	310000	400000	386000	392000
pmf0370	479.2	317	4.55	478.15	[M+H]+	Persicoside	Flavonoid	285000	223000	250000	724000	635000	522000	97000	102000	114000	66000	38500	61900	73000	56300	72900	72700	74500	49800
pmf0374	477.1	314	4.19	478.11	[M-H]-	Isorhamnetin 3-O-glucoside	Flavonoid	260000	211000	254000	671000	707000	735000	110000	134000	115000	137000	129000	128000	107000	98200	81100	77100	76900	70700
pmf0383	345.1	284	6.68	344.09	[M+H]+	"5,7-Dihydroxy-3',4',5'-trimethoxyflavone"	Flavonoid	14500	9920	12700	42400	43000	43000	9	9	9	9	9	9	9	9	9	9	9	9
pmf0417	595.2	287	3.7	596.17	[M-H]-	Eriocitrin	Flavonoid	105000	117000	103000	328000	343000	328000	116000	115000	100000	57700	47700	54600	35400	24800	27000	37100	38400	29700
pmf0550	609.2	301	4.15	608.17	[M+H]+	Diosmin	Flavonoid	172000	183000	192000	9	9	9	370000	378000	346000	180000	159000	266000	162000	108000	136000	53000	9	9
pmf0583	435.1	167	4.36	436.14	[M-H]-	Phloridzin	Flavonoid	15000000	13900000	13000000	45400000	47300000	54900000	5800000	5930000	5860000	5380000	5000000	5170000	2710000	2660000	2760000	1390000	1490000	1610000
pma1116	301.1	286	4.13	300.1	[M+H]+	Kaempferide	Flavonol	184000	195000	189000	496000	478000	404000	126000	146000	138000	135000	147000	113000	89800	87000	93800	62700	41600	40900
pma6639	479.2	317.2	4.17	478.2	[M+H]+	Isorhamnetin O-hexoside	Flavonol	227000	229000	235000	572000	470000	473000	94800	117000	101000	63400	123000	92400	90800	99300	101000	143000	128000	140000
pmb0565	509.1	347.2	3.41	508.1	[M+H]+	Syringetin 3-O-hexoside	Flavonol	78400	67100	39600	88400	203000	181000	40900	49000	55900	59300	9	9	18400	55200	9	116000	42600	95400
pmb0595	479.2	317.2	4.17	478.2	[M+H]+	Isorhamnetin 5-O-hexoside	Flavonol	252000	151000	232000	538000	391000	511000	87500	33200	92800	121000	117000	108000	122000	84800	83900	197000	177000	150000
pmb0711	611.2	303.1	3.7	610.2	[M+H]+	Quercetin 7-O-rutinoside	Flavonol	2800000	3410000	4440000	12000000	23500000	13300000	555000	672000	627000	559000	570000	630000	533000	352000	327000	345000	329000	251000
pmb3894	329.1	229.1	5.91	330.1	[M-H]-	Di-O-methylquercetin	Flavonol	2110000	2070000	2100000	4280000	4550000	4670000	1990000	2120000	2070000	2950000	2750000	2810000	531000	564000	530000	228000	245000	239000
pme0197	609.2	301	3.7	610.15	[M-H]-	Quercetin 3-O-rutinoside (Rutin)	Flavonol	13000000	12300000	12600000	61600000	63100000	63100000	2490000	2720000	2870000	2390000	1950000	2320000	1560000	1700000	1400000	1160000	1210000	1180000
pme0199	301	151	5.12	302.04	[M-H]-	Quercetin	Flavonol	267000	188000	168000	409000	415000	459000	28600	27900	30800	34200	21200	23300	16400	24100	14300	15800	21000	18700
pme0200	287	153	5.73	286.05	[M+H]+	Kaempferol	Flavonol	46000	35800	18800	59400	59200	73500	9	9	9	9	9	9	9	9	9	9	9	9
pme0321	431.1	285	4.94	432.11	[M-H]-	Kaempferol 7-O-rhamnoside	Flavonol	1660000	1750000	1580000	7750000	7880000	7970000	225000	244000	224000	204000	206000	192000	79100	70400	67100	48800	41700	38100
pme0361	435.1	303	3.98	434.08	[M+H]+	Quercetin 3-alpha-L-arabinofuranoside (Avicularin)	Flavonol	742000	765000	800000	3070000	3550000	3350000	228000	322000	302000	395000	228000	454000	281000	219000	248000	118000	124000	157000
pme0369	593.2	285	3.83	594.16	[M-H]-	Kaempferol 3-O-rutinoside (Nicotiflorin)	Flavonol	21800000	19900000	20500000	108000000	105000000	107000000	159000	183000	353000	133000	94700	511000	538000	679000	496000	58500	84800	125000
pme1502	315.1	300	7.23	314.08	[M+H]+	Kumatakenin	Flavonol	75100	72200	82000	314000	370000	402000	9	9	9	9	9	9	9	9	9	9	9	9
pme1524	305.1	231	4.14	304.06	[M+H]+	Dihydroquercetin (Taxifolin)	Flavonol	2610000	2550000	2630000	9870000	10400000	10600000	9	9	9	9	9	9	9	9	9	9	9	9
pme1540	625.2	317	3.66	624.17	[M+H]+	Isorhamnetin 3-O-neohesperidoside	Flavonol	179000	176000	171000	17900	22500	16600	334000	199000	230000	329000	135000	223000	184000	281000	269000	63300	49800	73200
pme1552	465.1	319	3.63	464.1	[M+H]+	Myricetin 3-O-rhamnoside (Myricitrin)	Flavonol	24900	32100	28000	9	9	9	9	45400	32600	40100	9	9	26300	44400	34700	53000	60300	19600
pme1605	593.2	285	3.76	594.16	[M-H]-	Kaempferol 3-O-robinobioside (Biorobin)	Flavonol	21900000	19200000	19800000	99500000	109000000	113000000	156000	188000	339000	119000	86300	508000	596000	683000	511000	65300	106000	112000
pme1622	447.1	285	3.93	448.1	[M-H]-	Kaempferol 3-O-glucoside (Astragalin)	Flavonol	2550000	1940000	2480000	9420000	9420000	9920000	1090000	1160000	1020000	680000	762000	728000	577000	431000	399000	182000	212000	209000
pme2491	577.5	285.2	3.74	578.16	[M-H]-	"Kaempferol 3,7-dirhamnoside (Kaempferitrin)"	Flavonol	99800	97800	75500	497000	378000	464000	49700	71500	62400	47000	46400	32500	17200	15400	19000	11600	14300	8190
pme2963	287.1	259	4.62	288.06	[M-H]-	Aromadedrin (Dihydrokaempferol)	Flavonol	195000	211000	206000	896000	922000	1020000	9	36100	18600	9	9	9	9	9	9	9	26400	9
pme3129	463	301	3.86	464.1	[M-H]-	Quercetin 4'-O-glucoside (Spiraeoside)	Flavonol	9710000	9020000	9010000	38500000	33600000	40200000	3320000	3670000	3330000	2890000	3250000	3840000	1760000	2080000	1870000	1450000	1470000	1320000
pme3211	463	301	3.86	464.1	[M-H]-	Quercetin 3-O-glucoside (Isotrifoliin)	Flavonol	9200000	8750000	8750000	38100000	32900000	38000000	3440000	3960000	3740000	3340000	2870000	3860000	1930000	2090000	1980000	1430000	1430000	1340000
pme3267	447	285	3.86	448.1	[M-H]-	Kaempferol 3-O-galactoside (Trifolin)	Flavonol	2200000	1990000	2010000	8730000	7380000	9120000	832000	999000	966000	630000	656000	676000	510000	405000	360000	197000	213000	171000
pme3296	431	285	4.48	432.11	[M-H]-	Kaempferol 3-O-rhamnoside (Kaempferin)	Flavonol	1500000	1410000	1470000	6440000	6560000	7070000	192000	209000	206000	165000	188000	164000	65000	74400	62700	35600	36100	34200
pme3396	289	215	3.65	288.06	[M+H]+	Fustin	Flavonol	352000	350000	358000	788000	858000	1110000	222000	217000	273000	228000	190000	164000	119000	140000	89000	66700	82600	70300
pme3410	333	153	5.15	332.05	[M+H]+	Laricitrin	Flavonol	109000	88700	109000	301000	306000	260000	9	9	9	9	9	9	9	9	9	9	9	9
pme3514	301	151	5.11	302.04	[M-H]-	Morin	Flavonol	268000	209000	187000	407000	403000	428000	26100	33100	33300	27100	25400	26700	25200	19300	18000	12100	16500	19200
pma0294	463.1	301	4.04	462.12	[M+H]+	Chrysoeriol 5-O-hexoside	Flavone	5590000	6000000	5580000	18900000	18700000	22400000	2060000	1960000	1870000	2270000	1980000	1970000	1270000	1370000	1280000	856000	939000	1040000
pma0724	435.1	285.1	3.79	434.1	[M+H]+	Naringenin C-hexoside	Flavone	183000	251000	290000	513000	687000	474000	205000	218000	228000	176000	132000	191000	91800	160000	74100	82500	56800	105000
pma1087	565.2	499.2	3.77	564.16	[M+H]+	C-pentosyl-C-hexosyl-apigenin	Flavone	105000	165000	170000	554000	496000	545000	40500	30900	49100	75200	9	9	35400	49200	36600	9	9	9
pma1108	433.1	283.1	3.78	432.11	[M+H]+	Apigenin C-glucoside	Flavone	385000	396000	297000	793000	799000	729000	231000	291000	261000	237000	331000	337000	89200	118000	84300	88200	107000	84700
pma6199	417.2	255.1	4.99	416.2	[M+H]+	Chrysin O-hexoside	Flavone	147000	127000	132000	92300	91300	107000	92200	81500	88500	109000	85800	81900	145000	120000	148000	207000	210000	209000
pma6353	417.2	297.1	4	416.2	[M+H]+	Chrysin C-hexoside	Flavone	331000	380000	368000	1330000	1220000	1130000	225000	273000	294000	261000	241000	238000	137000	90100	134000	107000	121000	91900
pma6371	611.2	473.1	3.08	610.2	[M+H]+	"di-C,C-hexosyl-luteolin"	Flavone	83900	95300	99600	63400	48100	101000	132000	85300	132000	138000	61100	144000	91400	89500	69000	46900	37000	26400
pma6499	509.3	347.1	3.41	508.3	[M+H]+	Limocitrin O-hexoside	Flavone	100000	107000	90600	176000	255000	218000	71600	114000	90000	73200	81300	9	9	9	9	95700	127000	124000
pma6516	757.3	595.2	3.55	756.3	[M+H]+	C-hexosyl-apigenin O-hexosyl-O-hexoside	Flavone	420000	369000	410000	244000	262000	312000	373000	334000	417000	359000	394000	330000	160000	178000	164000	9	9	150000
pma6558	313.1	298.1	7.22	314.08	[M-H]-	Velutin	Flavone	4500	6110	5260	17700	22800	25300	9	9	9	9	9	9	9	9	9	9	9	9
pma6576	347	153.2	4.41	346	[M+H]+	Spinacetin	Flavone	75400	57100	73000	40800	47200	24500	83400	70800	95500	70800	46100	66200	51200	49700	52200	50800	62400	19100
pma6586	567.3	405.2	4.04	566.3	[M+H]+	Tricin O-glycerylhexoside	Flavone	579000	666000	687000	9	9	34300	1320000	1270000	1350000	1070000	917000	907000	981000	881000	782000	99800	153000	147000
pma6647	625.2	607.1	3.37	624.2	[M+H]+	C-hexosyl-chrysoeriol O-hexoside	Flavone	578000	275000	625000	9	9	9	585000	781000	794000	620000	717000	625000	456000	449000	470000	569000	638000	461000
pmb0587	639.1	477	3.29	638.1	[M+H]+	Chrysoeriol O-glucuronic acid-O-hexoside	Flavone	44000	71800	50900	94500	79600	155000	92400	44100	48600	42800	84900	76900	65500	50100	46200	20700	45500	76400
pmb0588	611.1	449.3	3.32	610.1	[M+H]+	"Luteolin 3',7-di-O-glucoside"	Flavone	121000	211000	170000	686000	712000	751000	97000	114000	131000	98500	82800	91800	61000	43300	39700	60900	49000	39600
pmb0590	461.1	257.1	3.76	460.1	[M+H]+	Acacetin O-glucuronic acid	Flavone	108000	108000	126000	9	9	9	171000	107000	92100	65900	46400	99700	100000	133000	68100	65800	99900	30100
pmb0605	433.1	271.1	4.21	432.1	[M+H]+	Apigenin 7-O-glucoside (Cosmosiin)	Flavone	1600000	1610000	1550000	5500000	5650000	5700000	875000	1010000	967000	643000	586000	470000	409000	303000	336000	204000	171000	219000
pmb0607	463.2	301.1	4.3	462.2	[M+H]+	Chrysoeriol 7-O-hexoside	Flavone	5490000	5520000	5200000	19400000	19100000	22800000	2170000	1990000	1880000	2210000	2300000	1910000	1160000	1240000	1370000	960000	910000	962000
pmb0613	757.1	577.2	2.68	756.1	[M+H]+	Apigenin 6-C-hexosyl-8-C-hexosyl-O-hexoside	Flavone	58500	91300	83900	127000	128000	142000	49200	48500	64300	45900	54800	44700	9	36600	22500	9	9	9
pmb0615	789.1	626.8	2.58	788.1	[M+H]+	Hesperetin C-hexosyl-O-hexosyl-O-hexoside	Flavone	92000	88500	84400	9	9	9	62700	57000	48200	110000	145000	110000	90800	107000	108000	101000	125000	88000
pmb0618	627.1	465.1	2.78	626.1	[M+H]+	8-C-hexosyl-hesperetin O-hexoside	Flavone	252000	342000	328000	782000	746000	618000	168000	183000	152000	245000	239000	267000	161000	181000	136000	112000	97300	111000
pmb0622	611.2	473.1	3.09	610.2	[M+H]+	C-hexosyl-luteolin O-hexoside	Flavone	73800	63300	79700	58000	95700	80800	199000	92500	171000	151000	102000	125000	53600	80800	53100	37800	34900	33400
pmb0623	625.2	607.1	2.96	624.2	[M+H]+	6-C-hexosyl chrysoeriol O-hexoside	Flavone	453000	302000	386000	9	9	9	339000	615000	552000	248000	444000	392000	361000	393000	242000	389000	345000	436000
pmb0628	613.1	451.1	3.09	612.1	[M+H]+	Eriodictiol C-hexosyl-O-hexoside	Flavone	82600	72200	67100	91700	113000	151000	101000	102000	99600	127000	106000	149000	9	9	23100	9	9	9
pmb0629	463.1	313.1	3.04	462.1	[M+H]+	Chrysoeriol 6-C-hexoside	Flavone	162000	242000	243000	266000	264000	300000	260000	202000	267000	174000	276000	267000	92300	148000	140000	128000	126000	105000
pmb0639	757.2	595.2	3.13	756.2	[M+H]+	8-C-hexosyl-apigenin O-hexosyl-O-hexoside	Flavone	70500	82200	89100	9	9	9	83800	112000	101000	89100	126000	121000	107000	83500	134000	86500	83000	92700
pmb0647	581.1	419.1	3.46	580.1	[M+H]+	8-C-hexosyl-luteolin O-pentoside	Flavone	180000	95800	94600	207000	9	9	121000	135000	88400	83200	97200	33900	45300	82300	130000	40000	9	9
pmb0652	565.1	433.3	3.6	564.1	[M+H]+	C-hexosyl-apigenin O-pentoside	Flavone	49200	36600	42100	11200	9	31800	49400	9	62000	9	44200	54200	9	9	24500	19900	9	20800
pmb0660	757.2	147.1	3.73	756.2	[M+H]+	C-hexosyl-luteolin O-p-coumaroylhexoside	Flavone	20000	18600	12800	9	9	9	50700	39000	28300	47000	16300	16200	11200	9	9	9730	9	9
pmb0661	609.1	463.3	3.87	608.1	[M+H]+	Chrysoeriol C-hexosyl-O-rhamnoside	Flavone	52100	39100	42000	110000	206000	159000	9	9	9	9	9	9	9	9	9	9	9	9
pmb0663	611.1	317.1	3.75	610.1	[M+H]+	8-C-hexosyl-luteolin O-hexoside	Flavone	3140000	3340000	3240000	9	9	9	3220000	3660000	3280000	1720000	1660000	1830000	8770000	8700000	9950000	556000	538000	436000
pmb0665	611.2	465.1	3.78	610.2	[M+H]+	Luteolin 8-C-hexosyl-O-hexoside	Flavone	114000	124000	141000	412000	544000	613000	40700	72200	67300	39400	53700	51900	24000	17500	9	28100	9	9
pmb0696	625	463	3.46	624	[M+H]+	8-C-hexosyl chrysoeriol O-hexoside	Flavone	82100	48900	63400	9	9	9	65300	87800	54300	9	85000	86800	9	9	44500	9	9	9
pmb0736	493.1	331	4.3	492.1	[M+H]+	Tricin 7-O-hexoside	Flavone	141000	136000	106000	420000	342000	430000	95200	37700	118000	39100	110000	9	30800	35800	9	9	9	50000
pmb0746	527.1	331	5.84	526.1	[M+H]+	Tricin 4'-O-β-guaiacylglycerol	Flavone	26500	31400	22900	83200	68000	91200	9	9	9	9	9	9	9	9	9	9	9	9
pmb2954	771.1	609.3	2.83	772.1	[M-H]-	Luteolin O-hexosyl-O-hexosyl-O-hexoside	Flavone	51300	64600	61500	316000	312000	341000	9	9	9	9	9	9	9	9	9	9	9	9
pmb2969	625.1	445.2	2.47	626.1	[M-H]-	Hesperetin C-hexoside O-hexoside	Flavone	5220	2870	4960	10800	8670	9430	9	7700	4290	3140	5390	9	9	9	9	9	9	9
pmb2987	487.1	163	2.63	488.1	[M-H]-	Acacetin O-acetyl hexoside	Flavone	20400	28500	26500	24800	23300	32200	14300	18400	22700	21000	21300	29500	30200	44300	40500	48100	48200	35900
pmb3002	607.1	299	3.98	608.1	[M-H]-	Chrysoeriol 7-O-rutinoside	Flavone	10800	12400	10800	36100	35500	29100	9	9	9	9	9	9	9	9	9	9	9	9
pmb3005	621.1	299.2	4.07	622.1	[M-H]-	Chrysoeriol O-rhamnosyl-O-glucuronic acid	Flavone	30200	24500	47900	9	9	9	58200	65000	78200	66900	65500	84700	47600	42600	54600	31900	21800	20100
pmb3023	449.1	287	3.37	450.1	[M-H]-	Eriodictyol C-hexoside	Flavone	5780000	5310000	4730000	21200000	21600000	22100000	2510000	2810000	2800000	2560000	2270000	1670000	1180000	1180000	1090000	680000	678000	680000
pmb3024	447.1	327.1	3.45	448.1	[M-H]-	Luteolin C-hexoside	Flavone	70700	45700	65200	9	9	9	72400	67000	42300	61100	55300	31200	79400	73500	58900	61000	83900	75000
pmb3043	637.1	329.2	4.07	638.1	[M-H]-	Tricin 5-O-rutinoside	Flavone	24400	24800	25500	9	9	9	24500	24700	9	54900	48700	38600	27000	24100	17500	29900	29300	27300
pmb3047	657.1	495.1	4.5	658.1	[M-H]-	Tricin 4'-O-(syringyl alcohol) ether 5-O-hexoside	Flavone	18700	15500	15400	9	6770	9	16700	18200	12900	11900	16100	14600	9	10200	13300	29900	44900	37300
pme0089	287.1	153	5	286.1	[M+H]+	Luteolin	Flavone	80000	57800	40000	198000	217000	212000	9	9	9	9	9	9	9	9	9	9	9	9
pme0208	537.1	375	5.88	538.09	[M-H]-	Amentoflavone	Flavone	4740	2800	5120	48100	9	9	9	9	9	9	9	9	9	9	4500	9	9	9
pme0332	577.2	269	4.01	578.16	[M-H]-	Apigenin 7-O-neohesperidoside (Rhoifolin)	Flavone	433000	386000	369000	1400000	1100000	1430000	218000	287000	277000	189000	189000	166000	77400	69500	84000	35500	39800	46000
pme0359	433.1	271	3.81	432.11	[M+H]+	Apigenin 5-O-glucoside	Flavone	2080000	2180000	2150000	7600000	8050000	8690000	1290000	1260000	1350000	941000	917000	901000	582000	464000	397000	241000	200000	206000
pme0364	301.1	286	5.77	300.06	[M+H]+	Chrysoeriol	Flavone	46400	45500	34600	174000	153000	194000	9	9	9	9	9	9	9	9	9	9	9	9
pme0367	577.2	269	4.01	578.16	[M-H]-	Apigenin 7-rutinoside (Isorhoifolin)	Flavone	345000	371000	371000	1290000	1180000	1400000	235000	236000	257000	195000	193000	165000	86900	84600	68200	41500	46800	48900
pme0374	431.1	311	3.79	432.11	[M-H]-	Isovitexin	Flavone	281000	251000	273000	486000	505000	496000	224000	230000	248000	297000	314000	374000	132000	150000	129000	108000	92700	89100
pme1518	403.1	373	7.06	402.13	[M+H]+	Nobiletin	Flavone	5610000	5740000	5700000	26300000	25700000	26900000	484000	406000	397000	416000	955000	433000	416000	472000	441000	340000	403000	364000
pme1550	373.1	343	7.54	372.12	[M+H]+	Tangeretin	Flavone	2170000	2110000	2200000	9510000	9800000	9940000	356000	350000	351000	270000	1090000	243000	313000	413000	304000	224000	211000	212000
pme1611	433.1	313	3.75	434.12	[M-H]-	Isohemiphloin	Flavone	1540000	1470000	1460000	5550000	5660000	5860000	993000	1020000	1110000	962000	838000	841000	409000	478000	427000	299000	199000	292000
pme2459	449.1	287.2	3.87	448.1	[M+H]+	Luteolin 7-O-glucoside (Cynaroside)	Flavone	10500000	11000000	10400000	46500000	52100000	58200000	4430000	4510000	4160000	2990000	3200000	3010000	2590000	1700000	1910000	938000	823000	958000
pme3227	579	433	3.68	578.16	[M+H]+	Vitexin 2''-O-beta-L-rhamnoside	Flavone	814000	611000	719000	2150000	1960000	1630000	453000	494000	329000	320000	294000	214000	161000	238000	158000	106000	116000	125000
pme3475	273.1	153	5.59	272.07	[M+H]+	Butin	Flavone	209000	208000	211000	876000	791000	954000	83100	117000	84200	60700	49200	51900	9	9	49900	9	9	9
pmf0005	579.2	271	4.05	580.53	[M-H]-	Narirutin	Flavone	302000	278000	282000	629000	680000	779000	276000	287000	257000	169000	172000	155000	117000	136000	123000	91700	107000	93400
pmf0011	593.2	473	3.19	594.16	[M-H]-	"Apigenin 6,8-C-diglucoside"	Flavone	334000	339000	297000	301000	343000	315000	334000	399000	397000	420000	440000	447000	234000	249000	251000	255000	232000	251000
pmf0012	595.2	457.2	3.18	594.16	[M+H]+	"6,8-di-C-glucoside Apigenine"	Flavone	615000	729000	800000	624000	743000	674000	741000	664000	780000	891000	806000	900000	515000	522000	568000	471000	512000	487000
pmf0057	271.1	151	5.66	272.07	[M-H]-	"4,2',4',6'-Tetrahydroxychalcone "	Flavone	54800	53500	52300	138000	139000	159000	9	9	9	9	9	9	9	9	9	9	9	9
pmb0545	477.1	315	3.32	477.1	Protonated	Rosinidin O-hexoside	Anthocyanins	2820000	1820000	1760000	1010000	1030000	1030000	398000	436000	429000	273000	285000	234000	169000	190000	253000	148000	110000	137000
pmb0563	301.1	286	3.95	301.1	Protonated	Peonidin	Anthocyanins	195000	194000	226000	637000	681000	610000	149000	162000	108000	133000	136000	157000	91000	71100	82100	52900	96300	67800
pmb2957	465.1	285.1	2.59	466.1	[M-H]-	Cyanidin O-syringic acid	Anthocyanins	686000	678000	704000	1680000	1690000	1820000	509000	509000	465000	546000	474000	540000	270000	291000	277000	165000	190000	184000
pmb2962	473.1	268.1	3.19	474.1	[M-H]-	Pelargonidin O-acetylhexoside	Anthocyanins	14600	16200	9010	9	9	9	22200	26100	27200	28000	23400	21500	18300	15700	15200	12400	9	9
pme0094	447.3	284.7	2.61	448.3	[M-H]-	Cyanidin 3-O-glucoside (Kuromanin)	Anthocyanins	1350000	1260000	1130000	2710000	2730000	3190000	889000	853000	874000	1200000	960000	1080000	448000	560000	527000	303000	390000	308000
pme0444	493.2	331	2.92	493.2	Protonated	Malvidin 3-O-glucoside (Oenin)	Anthocyanins	332000	394000	334000	360000	270000	359000	431000	374000	479000	297000	317000	284000	256000	363000	344000	335000	410000	300000
pme1397	271	149	3.85	271.24	Protonated	Pelargonidin	Anthocyanins	62800	51700	64500	237000	201000	162000	9	9	9	9	9	9	9	9	9	9	9	9
pme1773	595	287	2.7	595	Protonated	Cyanidin 3-O-rutinoside (Keracyanin)	Anthocyanins	334000	305000	307000	699000	656000	604000	646000	619000	605000	600000	555000	525000	65600	126000	113000	144000	110000	116000
pme1793	595	270.9	2.38	595	Protonated	Pelargonin	Anthocyanins	413000	338000	410000	596000	630000	764000	171000	157000	138000	148000	129000	135000	49900	89000	80700	76800	96500	98100
pme3392	433.1	271	2.83	433.1	Protonated	Pelargonidin 3-O-beta-D-glucoside（Callistephin chloride)	Anthocyanins	878000	857000	1070000	2210000	1820000	2240000	669000	636000	684000	724000	813000	766000	412000	381000	364000	257000	240000	233000
pme3609	287	213	3.54	287.24	Protonated	Cyanidin	Anthocyanins	428000	388000	349000	1340000	1330000	990000	285000	282000	319000	233000	220000	267000	157000	140000	153000	182000	116000	90600
pmf0027	449.1	286.8	2.68	448.1	[M]+	Cyanidin 3-O-galactoside	Anthocyanins	2660000	1810000	1890000	7310000	4540000	5520000	1380000	1100000	1080000	1200000	1170000	1460000	558000	633000	684000	341000	522000	289000
pmf0203	463.1	301.1	2.94	498.09	[M-Cl]+	Peonidin 3-O-glucoside chloride	Anthocyanins	204000	254000	167000	214000	251000	215000	109000	115000	9	9	9	9	9	72700	9	9	9	9
pmf0264	255.1	157	3.67	290.03	[M]+	Apigeninidin chloride	Anthocyanins	52500	58700	47500	111000	108000	136000	44100	29900	40700	44000	33300	45900	17700	19500	28000	9	11500	9
pmf0616	697.1	535.1	3.03	697.1	Protonated	Malvidin 3-acetyl-5-diglucoside	Anthocyanins	94700	139000	67800	108000	119000	9	107000	120000	104000	153000	144000	124000	59500	9	60900	99100	9	9
pmb0837	577.1	425.3	2.92	576.1	[M+H]+	Procyanidin A3	Proanthocyanidins	2710000	1720000	2640000	9170000	8310000	9330000	1350000	1880000	1860000	747000	763000	9	9	9	9	9	9	9
pme0434	577	407.1	3.03	578.14	[M-H]-	Procyanidin B2	Proanthocyanidins	1010000	1120000	1060000	2620000	2590000	2390000	793000	968000	1030000	623000	622000	640000	321000	442000	370000	257000	208000	232000
pme0436	577.1	407.1	2.79	578.14	[M-H]-	Procyanidin B3	Proanthocyanidins	11900000	10800000	10900000	32900000	32200000	32700000	20000000	21200000	21000000	5220000	4590000	5610000	1340000	1680000	1600000	902000	700000	981000

## Sheet: Table S4
Table S4 Sequencing output data statistics
Sample	clean reads	cleans bases	Error Rate	Q20	Q30	GC content
T1-1	43834842	6575226300	0.58	94.405	87.02	46.885
T1-2	43198248	6479737200	0.565	94.56	87.28	46.945
T1-3	46078774	6911816100	0.56	94.64	87.485	47.185
T2-1	44301978	6645296700	0.605	94.075	86.46	46.845
T2-2	45713374	6857006100	0.575	94.425	87.045	46.865
T2-3	45488446	6823266900	0.625	93.84	86.085	46.725
T3-1	44039158	6605873700	0.625	93.85	86.07	47.3
T3-2	49272696	7390904400	0.565	94.555	87.31	47.2
T3-3	43551992	6532798800	0.555	94.665	87.485	47.285
T4-1	52967034	7945055100	0.59	94.3	86.8	46.24
T4-2	46459490	6968923500	0.54	94.88	87.865	46.455
T4-3	53139382	7970907300	0.62	93.87	86.065	46.35
T5-1	46969264	7045389600	0.66	93.44	85.415	45.71
T5-2	44944116	6741617400	0.58	94.37	87.01	45.835
T5-3	152237752	22835662800	0.43	96.25	90.505	46.13

## Sheet:  Table S5
Table S5 Structural genes associated with flavonoid metabolic pathways
gene name	gene ID	FPKM
		T1	T2	T3	T4	T5
F3H1	Achn075731	1.3683	1.00278	0.531961	0.469788	1.21524
F3H2	Achn201551	0.932163	0.739046	0.515539	0.871044	1.32693
F3H3	Achn201561	0.96604	0.659664	0.5752	0.70484	1.30395
LDOX1	Achn002561	1.54818	0	0.048133	0	0.223943
LDOX2	Achn361621	2.78241	2.2363	1.58406	1.09831	1.17838
PAL1	Achn166341	0.638513	0.289423	0.094714	0.034353	0.551908
PAL2	Achn166351	0.258502	0.360799	0.222601	0.195588	0.64955
PAL3	Achn204011	0.953248	0.400741	0.094327	0.033084	0.107075
PAL4	Achn108911	0.890665	0.332823	0	0	0.668319
PAL5	Achn364611	0.899554	0.438905	0.062807	0.034875	0.022439
CHS1	Achn168721	2.26492	2.25173	1.90916	1.80534	2.08944
CHS2	Achn214721	0.058315	0	0	0.085458	0.231478
CHS3	Achn238171	1.49063	0.036284	0.20969	0	1.53984
CHS4	Achn109041	1.47425	0.302076	0.424162	1.45295	1.98474
CHS5	Achn369761	1.92067	0.533816	0.299966	0.192291	1.81179
DFR1	Achn165351	0	0.142472	0	0	0.015451
DFR2	Achn014351	0.816369	1.20367	1.08459	1.34619	1.57282
DFR3	Achn135311	2.31201	2.04392	1.82158	1.62651	1.82446
FLS1	Achn360251	0.291155	0.68778	0.778829	0.812878	0.495221
FLS2	Achn366001	0.535272	0	0.041686	0	0
FLS3	Achn117061	2.46933	1.80831	1.52579	1.56977	1.94208
FLS4	Achn140871	0.764393	0.444665	0.301263	0.015756	0.0601
FLS5	Achn177561	0.501247	0.03506	0.066267	0	0.021779
FLS6	Achn154271	0.222413	0	0	0	0.054157
FLS7	Achn243221	0.919615	0.777453	0.564907	0.848512	1.38585
F3‘H1	Achn075731	1.3683	1.00278	0.531961	0.469788	1.21524
F3‘H2	Achn201551	0.932163	0.739046	0.515539	0.871044	1.32693
LAR1	Achn166621	0.505041	0.498688	0.214207	0.268623	0.443516
LAR2	Achn221841	2.00153	0.914936	0.81868	1.05887	0.998805
4CL1	Achn228581	0.479916	0.340426	0.146012	0.412298	0.407209
4CL2	Achn213291	0.857614	1.24107	1.30278	1.54842	1.29979
4CL3	Achn196321	0.06196	0.113825	0.038921	0	0
4CL4	Achn267571	1.45463	1.26853	0.54262	0.527129	0.834085
4CL5	Achn258411	1.53263	1.73027	1.74672	2.18979	2.57952
ANR1	Achn030761	1.74208	1.15525	0.684979	0.369931	1.20823
ANR2	Achn111861	1.96699	2.17224	2.10635	1.55935	1.44571
CHI1	Achn287691	2.10399	2.29318	2.38952	2.38675	2.45977
CHI2	Achn332121	1.85871	1.81024	1.75436	1.856	1.99266
CHI3	Achn104811	1.59696	1.74041	1.67735	1.81056	1.83104
CHI4	Achn203601	1.41909	1.62636	1.54175	1.59313	1.82484
C4H	Achn022871	0.554157	0.458566	0.397333	0.243226	0.062214

## Sheet: Table S6
Table S6 List of genes and transcription factors that regulate flavonoid metabolism
ID	degree	type	node name
Achn303191	23	gene	CYP73A
Achn273661	21	gene	E2.1.1.104
Achn270471	19	gene	CYP98A1
Achn361621	19	gene	ANS1
Achn221841	18	gene	LAR
Achn002561	16	gene	ANS2
Achn040951	16	gene	CYP98A2
Achn314151	15	gene	CYP73A1
Achn199471	14	TF	MYB9
Achn366001	14	gene	FLS3
Achn048081	13	gene	HCT4
Achn117061	13	gene	FLS1
Achn215991	13	TF	MYB11
Achn096511	12	TF	BHLH10
Achn221861	12	TF	BHLH21
Achn310341	12	TF	BHLH29
Achn109411	11	TF	MYB5
Achn088391	10	TF	BHLH9
Achn309961	10	gene	HCT2
Achn349071	10	gene	HCT10
Achn135311	9	gene	DFR
Achn346301	9	TF	BHLH32
Achn021041	8	TF	BHLH2
Achn084581	8	TF	BHLH6
Achn087871	8	TF	BHLH8
Achn106671	8	TF	BHLH12
Achn116251	8	TF	BHLH13
Achn140871	8	gene	FLS3
Achn256021	8	TF	MYB14
Achn281761	8	TF	BHLH28
Achn335591	8	TF	BHLH31
Achn348771	8	TF	BHLH33
Achn349431	8	gene	HCT3
Achn029591	7	TF	MYB2
Achn157501	7	TF	BHLH17
Achn195991	7	gene	HCT5
Achn213031	7	gene	HCT1
Achn349441	7	gene	HCT6
Achn365361	7	TF	MYB20
Achn017041	6	TF	BHLH1
Achn018291	6	TF	MYB1
Achn085041	6	gene	CYP75A
Achn159561	6	TF	BHLH19
Achn177561	6	gene	FLS2
Achn182891	6	TF	MYB8
Achn102731	5	TF	MYB4
Achn145641	5	TF	MYB7
Achn239971	5	TF	BHLH24
Achn243221	5	gene	FLS5
Achn253521	5	TF	BHLH26
Achn267491	5	TF	MYB15
Achn289001	5	TF	MYB16
Achn324811	5	TF	MYB18
Achn349371	5	gene	HCT6
Achn349401	5	gene	HCT7
Achn067341	4	TF	MYB3
Achn201551	4	gene	E1.14.11.9
Achn214151	4	gene	CYP73A2
Achn228371	4	TF	MYB13
Achn244201	4	TF	BHLH25
Achn280921	4	gene	HCT8
Achn307151	4	TF	MYB17
Achn014351	3	gene	DFR
Achn211521	3	TF	BHLH36
Achn222381	3	TF	BHLH22
Achn232701	3	TF	BHLH23
Achn349381	3	gene	HCT9
Achn382461	3	TF	MYB21
Achn030801	2	TF	BHLH3
Achn039371	2	TF	BHLH4
Achn075131	2	TF	BHLH5
Achn104421	2	TF	BHLH11
Achn125541	2	TF	BHLH14
Achn127411	2	TF	BHLH16
Achn154271	2	gene	FLS4
Achn211821	2	TF	MYB10
Achn318391	2	TF	BHLH30
Achn358591	2	TF	MYB19
Achn087151	1	TF	BHLH7
Achn125991	1	TF	BHLH15
Achn141271	1	TF	MYB6
Achn158001	1	TF	BHLH18
Achn206741	1	TF	BHLH20
Achn218481	1	TF	MYB12
Achn271221	1	TF	BHLH27
Achn354401	1	TF	BHLH34
Achn368981	1	TF	BHLH35

## Sheet:  Table S7
Table S7 Structural genes associated with carotenoid metabolic pathways
gene name	gene ID	FPKM
		20d	58d	97d	136d	175d
PSY1	Achn335751	1.67258	1.45909	1.01637	1.38027	1.59692
PSY2	Achn388591	1.66296	1.60691	1.42617	1.56889	1.60125
CrtISO	Achn058301	1.36434	1.39312	1.39381	1.45136	1.4115
ZDS	Achn274521	1.06568	1.30784	1.38095	1.43592	1.23339
PDS	Achn199641	1.39807	1.40336	1.53888	1.57481	1.51374
LCYB1	Achn198281	0.883255	0.990132	0.887223	0.825183	0.383268
LCYB2	Achn347121	0.73726	1.62486	1.63912	2.87479	2.95239
LCYB3	Achn358971	1.10042	1.28458	1.11635	1.30722	1.28021
LCYE1	Achn061261	0.538366	0.245628	0.173646	0.181465	0.32588
LCYE2	Achn326611	1.74798	1.34256	1.21708	1.19918	1.08377
ZEP	Achn013171	1.24349	0.890177	0.710769	1.24161	1.22544
CYP1	Achn368041	1.11408	1.07992	1.00472	1.10914	0.995072
CYP2	Achn368031	0.826528	0.807907	0.758705	0.715929	0.784234
CCD1	Achn029551	0.245207	0.070144	0.074013	0.109907	0.264308
CCD2	Achn378731	2.09827	2.09931	2.22546	2.47893	2.59182
ZISO1	Achn248961	1.31262	1.44099	1.36017	1.74766	1.73815
ZISO2	Achn232101	1.14516	0.997447	0.758094	0.815589	0.931698
ZISO3	Achn034641	1.21322	1.57328	1.61593	1.38372	1.12639
VDE1	Achn368041	1.11408	1.07992	1.00472	1.10914	0.995072
VDE2	Achn368031	0.826528	0.807907	0.758705	0.715929	0.784234
crtZ	Achn011691	0.515715	0	0.114352	0	0

## Sheet: Table S8
Table S8 Attached table 1-5 Statistical table of absolute carotenoid content
group	20d		97d		136d		175d
component	mean	sd	mean	sd	mean	sd	mean	sd
α-Carotene	0.0568	0.0019	0.0383	0.0016	0.0124	0.0007	0.0168	0.0008
α-Cryptoxanthin	0.0585	0.0008	0.6304	0.0593	1.6237	0.0279	4.1257	0.0066
β-Carotene	5.585	0.301	1.854	0.1038	1.1377	0.0674	0.6287	0.0154
Apocarotenal	0.4351	0.004	N/A	N/A	N/A	N/A	N/A	N/A
β-Cryptoxanthin	0.9744	0.0135	4.645	0.3388	25.84	1.3844	66.6967	1.1296
Lutein	37.9167	1.2607	22.81	0.3785	10.0227	0.4175	0.8556	0.0243
Neoxanthin	2.446	0.0351	2.3813	0.0542	1.1863	0.0253	0.5022	0.0025
Zeaxanthin	0.2822	0.0233	0.373	0.025	N/A	N/A	N/A	N/A
Violaxanthin	1.0373	0.033	0.7535	0.024	0.4035	0.0156	0.14	0.0025
Antheraxanthin	0.43	0.0089	0.3176	0.0081	0.3194	0.0025	0.2871	0.0011

## Sheet:  Table S9
Table S9 Transcription factors in the "Blue" module
Gene ID	Family	Gene ID	Family	Gene ID	Family	Gene ID	Family	Gene ID	Family
Achn001011	B3	Achn066211	AP2/ERF-ERF	Achn155631	HSF	Achn234221	C3H	Achn324431	HB-HD-ZIP
Achn002711	C2C2-YABBY	Achn067341	MYB	Achn163771	NAC	Achn235371	MADS-M-type	Achn327221	MADS-MIKC
Achn003771	NAC	Achn068771	WRKY	Achn165911	C2H2	Achn241031	MADS-M-type	Achn330471	Trihelix
Achn003781	NAC	Achn072221	C2H2	Achn167011	C3H	Achn242211	MYB-related	Achn331841	HB-BELL
Achn004451	C3H	Achn076941	GARP-G2-like	Achn169451	C2C2-Dof	Achn243421	GARP-G2-like	Achn332821	GRAS
Achn005241	LOB	Achn077531	NAC	Achn169681	NAC	Achn244531	WRKY	Achn339971	GRAS
Achn006961	HB-other	Achn078141	HB-BELL	Achn171491	C2H2	Achn246351	C3H	Achn340021	HSF
Achn007901	bHLH	Achn081581	HSF	Achn176141	TUB	Achn251751	AP2/ERF-RAV	Achn340691	DBB
Achn012091	MYB	Achn081921	HB-BELL	Achn179541	NAC	Achn253001	CAMTA	Achn340741	BBR-BPC
Achn013391	MYB	Achn082601	C3H	Achn182561	WRKY	Achn258281	C2H2	Achn342201	B3
Achn014771	B3	Achn086751	C3H	Achn183011	TCP	Achn262891	CSD	Achn344281	bZIP
Achn016531	PLATZ	Achn088151	C2C2-YABBY	Achn184961	C2H2	Achn266441	NAC	Achn348711	B3-ARF
Achn016981	NAC	Achn102881	GRAS	Achn185971	SBP	Achn266591	AP2/ERF-ERF	Achn351781	MYB-related
Achn020631	C3H	Achn102891	GRAS	Achn187281	AP2/ERF-ERF	Achn273201	NF-YB	Achn351801	WRKY
Achn023421	B3-ARF	Achn104221	NAC	Achn195411	MYB	Achn273801	B3-ARF	Achn353281	WRKY
Achn023891	GRAS	Achn108891	B3-ARF	Achn196311	CAMTA	Achn279821	bZIP	Achn353411	bHLH
Achn024761	bZIP	Achn111051	NAC	Achn196331	SBP	Achn281921	B3	Achn354401	bHLH
Achn025371	C3H	Achn119271	NF-YC	Achn197411	NAC	Achn284071	FAR1	Achn358711	HSF
Achn030051	bHLH	Achn121981	C2C2-Dof	Achn200711	C2H2	Achn285481	AP2/ERF-ERF	Achn359401	HSF
Achn033621	AP2/ERF-ERF	Achn123541	bHLH	Achn203701	C3H	Achn286431	MYB-related	Achn360501	FAR1
Achn033871	C3H	Achn124291	HSF	Achn204501	C2C2-GATA	Achn288721	TCP	Achn362971	C3H
Achn035131	bHLH	Achn124861	Trihelix	Achn204621	bHLH	Achn289301	NAC	Achn364401	NF-YC
Achn040631	MYB	Achn125121	WRKY	Achn204961	MYB-related	Achn294101	MYB	Achn364571	C2C2-GATA
Achn042811	GARP-G2-like	Achn125991	bHLH	Achn211521	bHLH	Achn295081	CSD	Achn366151	LOB
Achn049431	Trihelix	Achn131841	BES1	Achn213761	MYB-related	Achn300901	E2F-DP	Achn368611	CPP
Achn049821	HB-HD-ZIP	Achn132831	WRKY	Achn214091	MYB-related	Achn304551	HB-HD-ZIP	Achn372791	B3
Achn050591	C2C2-Dof	Achn135131	SRS	Achn214311	GRAS	Achn306541	BBR-BPC	Achn378921	C3H
Achn054961	AP2/ERF-ERF	Achn135561	bZIP	Achn219211	NAC	Achn307151	MYB	Achn381591	C3H
Achn055521	bHLH	Achn137791	C2C2-Dof	Achn222381	bHLH	Achn308011	PLATZ	Achn382341	GeBP
Achn057431	TUB	Achn141001	HB-WOX	Achn223911	MYB	Achn310981	AP2/ERF-ERF	Achn382471	MYB
Achn058181	MADS-M-type	Achn141091	MYB-related	Achn225201	HB-HD-ZIP	Achn311801	NAC	Achn383981	C2C2-YABBY
Achn060161	C2H2	Achn141271	MYB	Achn227711	bZIP	Achn312121	Trihelix	Achn387241	Trihelix
Achn062291	bZIP	Achn141461	bHLH	Achn227931	AP2/ERF-ERF	Achn314121	AP2/ERF-ERF	Achn387251	Trihelix
Achn062471	AP2/ERF-ERF	Achn142181	E2F-DP	Achn229321	bZIP	Achn314621	OFP	Achn390831	WRKY
Achn062481	MYB-related	Achn144711	C2C2-Dof	Achn230981	WRKY	Achn317941	C3H	Achn324431	HB-HD-ZIP
Achn063851	GARP-G2-like	Achn146381	OFP	Achn231641	TCP	Achn318511	HSF	Achn327221	MADS-MIKC
Achn065621	CPP	Achn148821	MYB	Achn233451	GARP-G2-like	Achn320031	C3H	Achn330471	Trihelix

## Sheet:  Table S10
Table S10 Transcription factors screened in the database
Gene ID	Gene ID	Gene ID	Gene ID	Gene ID	Gene ID
Achn015881	Achn284751	Achn179621	Achn210631	Achn284751	Achn214671
Achn036201	Achn312121	Achn014701	Achn230461	Achn366731	Achn226291
Achn230461	Achn331661	Achn015881	Achn246921	Achn037211	Achn230341
Achn284751	Achn335241	Achn040131	Achn274201	Achn013141	Achn230461
Achn358711	Achn351451	Achn050591	Achn284751	Achn015761	Achn248441
Achn366731	Achn366731	Achn137791	Achn324431	Achn015881	Achn260831
Achn013141	Achn015881	Achn284751	Achn366731	Achn021041	Achn270801
Achn015881	Achn098041	Achn366731	Achn053001	Achn037111	Achn274601
Achn021041	Achn197141	Achn015881	Achn344231	Achn057971	Achn278691
Achn036931	Achn230461	Achn088031	Achn366731	Achn065561	Achn284751
Achn050501	Achn284751	Achn230461	Achn036931	Achn077031	Achn302861
Achn065561	Achn307261	Achn366731	Achn051151	Achn088031	Achn305371
Achn088031	Achn366731	Achn006571	Achn205451	Achn091811	Achn310981
Achn091811	Achn029931	Achn088031	Achn234861	Achn096361	Achn331571
Achn096361	Achn188871	Achn184391	Achn312121	Achn118321	Achn355681
Achn110521	Achn193381	Achn230461	Achn330471	Achn127411	Achn366731
Achn131571	Achn194051	Achn013141	Achn159441	Achn128581	Achn015881
Achn141871	Achn230461	Achn015881	Achn196271	Achn131571	Achn088031
Achn167681	Achn270801	Achn021041	Achn014701	Achn141871	Achn230461
Achn173651	Achn284751	Achn046891	Achn179621	Achn173651	Achn284751
Achn205451	Achn359401	Achn088031	Achn014701	Achn187281	Achn366731
Achn210631	Achn359611	Achn123251	Achn015881	Achn190661	Achn014701
Achn230461	Achn366731	Achn127411	Achn040131	Achn194051
Achn254561	Achn379451	Achn131571	Achn050591	Achn205451
Achn266591	Achn014701	Achn210611	Achn137791	Achn210631

[truncated: 2 more sheets:  Table S11, Table S12]
